# Supplementary material
Source: PubMed Central journal article supplement (PMC7971424)
Supplement: cpp.2020-026_appendix1.pdf [file cpp.2020-026_appendix1.pdf]

## Appendix B: Additional Plots and Tables

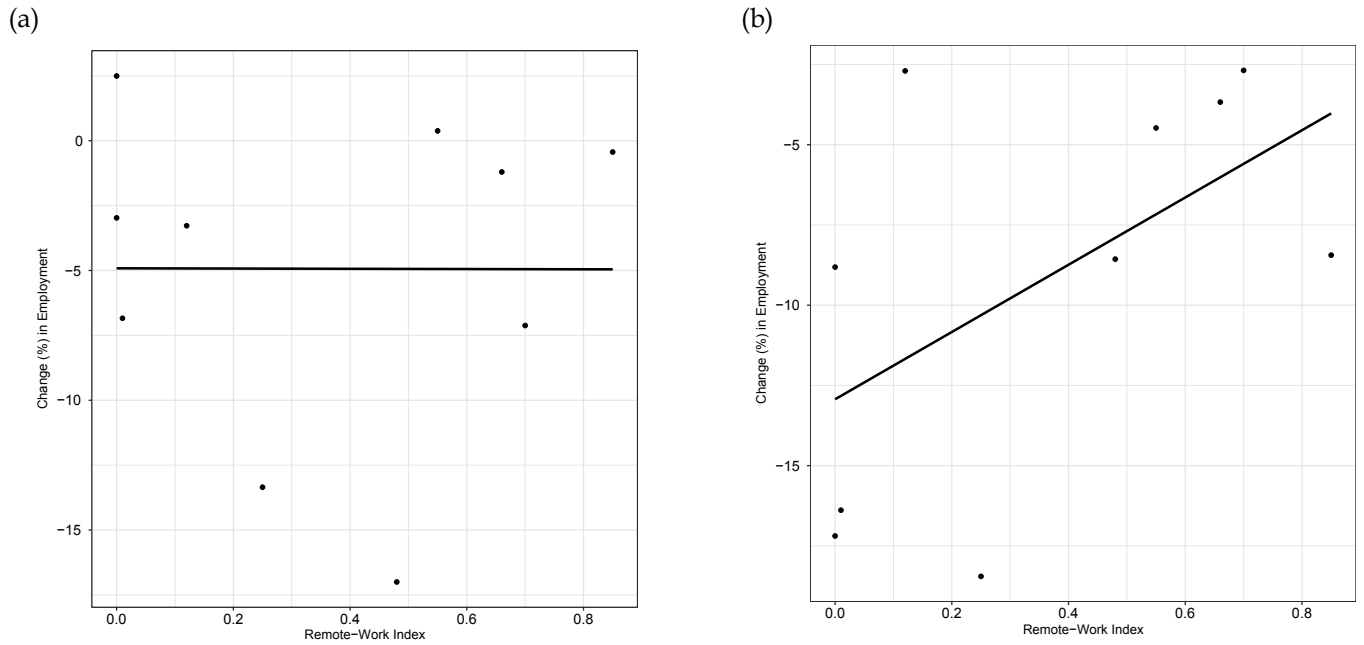

**Figure B.1:** Employment Dynamics and Remote Work Index (Ten NOC Broad Occupation Groups): (a) February–March 2020, % change and (b) March–April 2020, % change

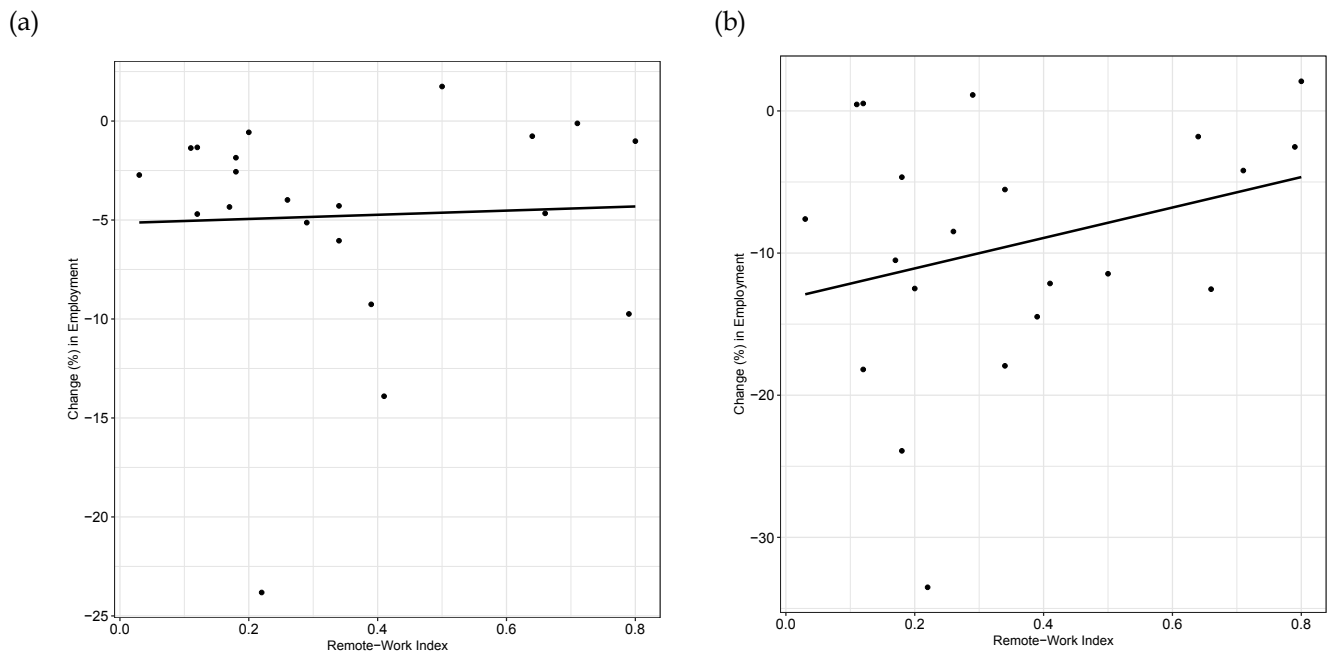

**Figure B.2:** Employment Dynamics and Remote Work Index (by Industry): (a) February–March 2020, % change and (b) March–April 2020, % change

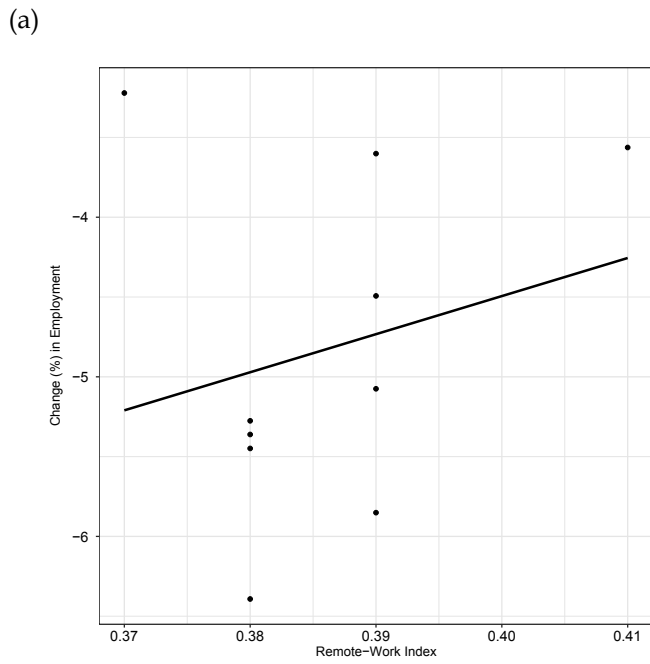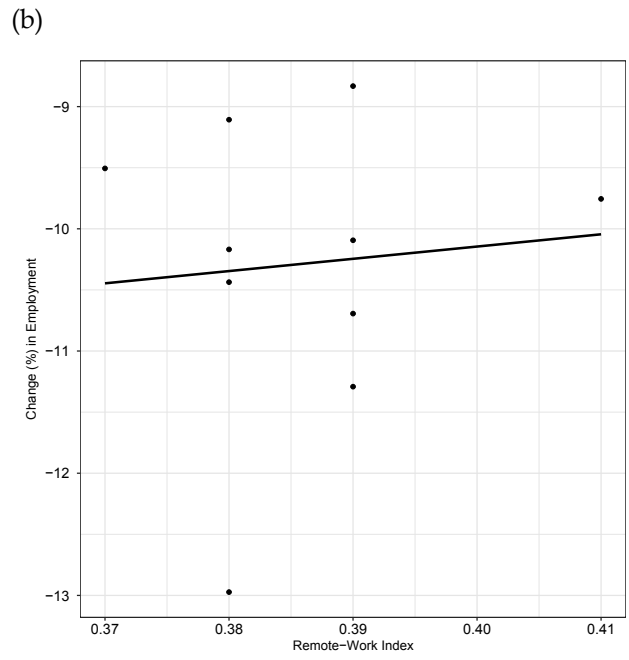

**Figure B.3:** Employment Dynamics and Remote Work Index (by Province): (a) February–March 2020, % change and (b) March–April 2020, % change

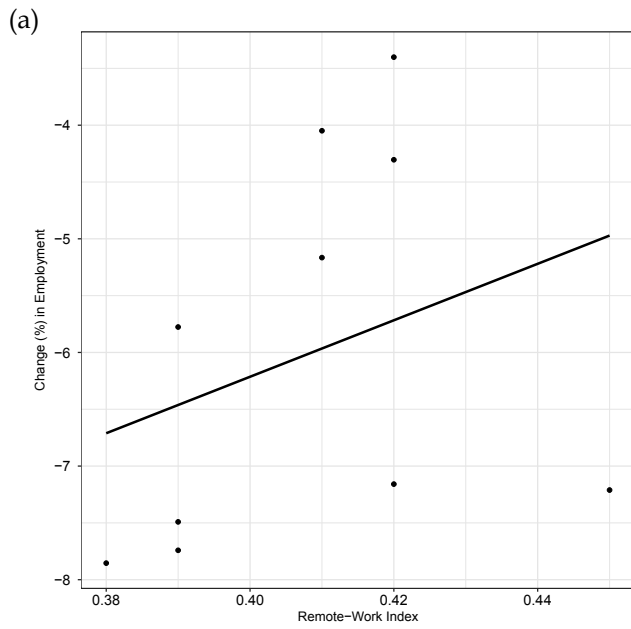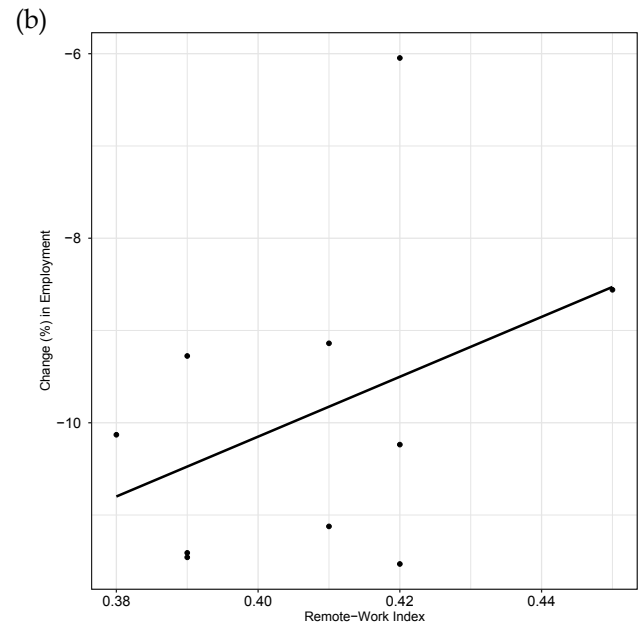

**Figure B.4:** Employment Dynamics and Remote Work Index (by City): (a) February–March 2020, % change and (b) March–April 2020, % change

**Table B.1:** Employment Change and Remote Work Index: (Benchmark Remote Work Index and Essential Service Dummy Variable)

| Covariate           | Monthly Percentage Change in Employment |                   |                        |                   |                        |                      |                        |                       |
|---------------------|-----------------------------------------|-------------------|------------------------|-------------------|------------------------|----------------------|------------------------|-----------------------|
|                     | $\Delta q_{j,Jan,Feb}$                  |                   | $\Delta q_{j,Feb,Mar}$ |                   | $\Delta q_{j,Mar,Apr}$ |                      | $\Delta q_{j,Feb,Apr}$ |                       |
|                     | (1)                                     | (2)               | (3)                    | (4)               | (5)                    | (6)                  | (7)                    | (8)                   |
| $S_j$ (Benchmark)   | -0.118<br>(2.190)                       | -0.047<br>(2.231) | 0.385<br>(2.984)       | 0.805<br>(2.976)  | 4.691<br>(3.590)       | 5.128<br>(3.601)     | 4.749<br>(4.905)       | 5.570<br>(4.846)      |
| $D_j$               |                                         | -0.508<br>(1.730) |                        | -2.980<br>(2.308) |                        | -3.105<br>(2.792)    |                        | -5.823<br>(3.758)     |
| Constant            | 0.750<br>(1.123)                        | 1.030<br>(1.484)  | -4.865***<br>(1.529)   | -3.222<br>(1.980) | -11.238***<br>(1.840)  | -9.525***<br>(2.395) | -15.357***<br>(2.514)  | -12.146***<br>(3.224) |
| No. of observations | 40                                      | 40                | 40                     | 40                | 40                     | 40                   | 40                     | 40                    |
| $R^2$               | 0.0001                                  | 0.002             | 0.0004                 | 0.044             | 0.043                  | 0.074                | 0.024                  | 0.084                 |
| Adjusted $R^2$      | -0.026                                  | -0.052            | -0.026                 | -0.008            | 0.018                  | 0.024                | -0.002                 | 0.034                 |

Notes:  $\Delta q_{j,t,\tau}$  is the percentage of change in employment between month  $t$  and  $\tau$  in occupation  $j$ ,  $S_j$  (Benchmark) is the remote work index, and  $D_j$  is the essential service dummy variable.

\* $p < 0.1$ ; \*\* $p < 0.05$ ; \*\*\* $p < 0.01$ .

Source: Authors' calculations.

**Table B.2:** Employment Change and Remote Work Index: (Alternative Remote Work Index and Essential Service Dummy Variable)

| Covariate           | Monthly Percentage Change in Employment |                   |                        |                    |                        |                      |                        |                       |
|---------------------|-----------------------------------------|-------------------|------------------------|--------------------|------------------------|----------------------|------------------------|-----------------------|
|                     | $\Delta q_{j,Jan,Feb}$                  |                   | $\Delta q_{j,Feb,Mar}$ |                    | $\Delta q_{j,Mar,Apr}$ |                      | $\Delta q_{j,Feb,Apr}$ |                       |
|                     | (1)                                     | (2)               | (3)                    | (4)                | (5)                    | (6)                  | (7)                    | (8)                   |
| $S_j$ (Alternative) | -0.393<br>(2.483)                       | -0.293<br>(2.539) | 1.452<br>(3.377)       | 2.095<br>(3.374)   | 6.020<br>(4.045)       | 6.704<br>(4.063)     | 6.977<br>(5.515)       | 8.245<br>(5.449)      |
| $D_j$               |                                         | -0.483<br>(1.737) |                        | -3.114<br>(2.308)  |                        | -3.317<br>(2.779)    |                        | -6.147<br>(3.727)     |
| Constant            | 0.838<br>(1.166)                        | 1.095<br>(1.499)  | -5.211***<br>(1.586)   | -3.554*<br>(1.992) | -11.605***<br>(1.900)  | -9.840***<br>(2.399) | -16.020***<br>(2.590)  | -12.749***<br>(3.217) |
| No. of observations | 40                                      | 40                | 40                     | 40                 | 40                     | 40                   | 40                     | 40                    |
| $R^2$               | 0.001                                   | 0.003             | 0.005                  | 0.052              | 0.055                  | 0.090                | 0.040                  | 0.106                 |
| Adjusted $R^2$      | -0.026                                  | -0.051            | -0.021                 | 0.0002             | 0.030                  | 0.041                | 0.015                  | 0.058                 |

Notes:  $\Delta q_{j,t,\tau}$  is the percentage of change in employment between month  $t$  and  $\tau$  in occupation  $j$ ,  $S_j$  (Alternative) is the remote work index, and  $D_j$  is the essential service dummy variable.

\* $p < 0.1$ ; \*\* $p < 0.05$ ; \*\*\* $p < 0.01$ .

Source: Authors' calculations.

**Table B.3:** Employment Change and Remote Work Index: Two-Digit level (Benchmark Remote Work Index and Essential Service Index)

| Covariate           | Monthly Percentage Change in Employment |                   |                        |                      |                        |                       |                        |                       |
|---------------------|-----------------------------------------|-------------------|------------------------|----------------------|------------------------|-----------------------|------------------------|-----------------------|
|                     | $\Delta q_{j,Jan,Feb}$                  |                   | $\Delta q_{j,Feb,Mar}$ |                      | $\Delta q_{j,Mar,Apr}$ |                       | $\Delta q_{j,Feb,Apr}$ |                       |
|                     | (1)                                     | (2)               | (3)                    | (4)                  | (5)                    | (6)                   | (7)                    | (8)                   |
| $S_j$ (Benchmark)   | -0.118<br>(2.190)                       | -0.138<br>(2.221) | 0.385<br>(2.984)       | 0.442<br>(3.021)     | 4.691<br>(3.590)       | 4.971<br>(3.498)      | 4.749<br>(4.905)       | 5.061<br>(4.847)      |
| $ES_j$              |                                         | -0.569<br>(2.873) |                        | 1.617<br>(3.907)     |                        | 7.984*<br>(4.525)     |                        | 8.882<br>(6.269)      |
| Constant            | 0.750<br>(1.123)                        | 0.902<br>(1.373)  | -4.865***<br>(1.529)   | -5.298***<br>(1.867) | -11.238***<br>(1.840)  | -13.374***<br>(2.162) | -15.357***<br>(2.514)  | -17.734***<br>(2.995) |
| No. of observations | 40                                      | 40                | 40                     | 40                   | 40                     | 40                    | 40                     | 40                    |
| $R^2$               | 0.0001                                  | 0.001             | 0.0004                 | 0.005                | 0.043                  | 0.117                 | 0.024                  | 0.074                 |
| Adjusted $R^2$      | -0.026                                  | -0.053            | -0.026                 | -0.049               | 0.018                  | 0.070                 | -0.002                 | 0.024                 |

Notes:  $\Delta q_{j,t,\tau}$  is the percentage of change in employment between month  $t$  and  $\tau$  in occupation  $j$ ,  $S_j$  (Benchmark) is the remote work index, and  $ES_j$  is the essential service variable.

\*  $p < 0.1$ ; \*\*  $p < 0.05$ ; \*\*\*  $p < 0.01$ .

Source: Authors' calculations.

**Table B.4:** Employment Change and Remote Work Index: Two-Digit level (Alternative Remote Work Index and Essential Service Index)

| Covariate           | Monthly Percentage Change in Employment |                   |                        |                      |                        |                       |                        |                       |
|---------------------|-----------------------------------------|-------------------|------------------------|----------------------|------------------------|-----------------------|------------------------|-----------------------|
|                     | $\Delta q_{j,Jan,Feb}$                  |                   | $\Delta q_{j,Feb,Mar}$ |                      | $\Delta q_{j,Mar,Apr}$ |                       | $\Delta q_{j,Feb,Apr}$ |                       |
|                     | (1)                                     | (2)               | (3)                    | (4)                  | (5)                    | (6)                   | (7)                    | (8)                   |
| $S_j$ (Alternative) | -0.393<br>(2.483)                       | -0.439<br>(2.524) | 1.452<br>(3.377)       | 1.586<br>(3.426)     | 6.020<br>(4.045)       | 6.659*<br>(3.935)     | 6.977<br>(5.515)       | 7.693<br>(5.447)      |
| $ES_j$              |                                         | -0.605<br>(2.880) |                        | 1.749<br>(3.908)     |                        | 8.355*<br>(4.489)     |                        | 9.351<br>(6.213)      |
| Constant            | 0.838<br>(1.166)                        | 1.008<br>(1.431)  | -5.211***<br>(1.586)   | -5.702***<br>(1.942) | -11.605***<br>(1.900)  | -13.951***<br>(2.231) | -16.020***<br>(2.590)  | -18.645***<br>(3.088) |
| No. of observations | 40                                      | 40                | 40                     | 40                   | 40                     | 40                    | 40                     | 40                    |
| $R^2$               | 0.0001                                  | 0.002             | 0.005                  | 0.0010               | 0.055                  | 0.136                 | 0.040                  | 0.096                 |
| Adjusted $R^2$      | -0.026                                  | -0.052            | -0.021                 | -0.043               | 0.030                  | 0.089                 | 0.015                  | 0.047                 |

Notes:  $\Delta q_{j,t,\tau}$  is the percentage of change in employment between month  $t$  and  $\tau$  in occupation  $j$ ,  $S_j$  (Alternative) is the remote work index, and  $ES_j$  is the essential service variable.

\*  $p < 0.1$ ; \*\*  $p < 0.05$ ; \*\*\*  $p < 0.01$ .

Source: Authors' calculations.

**Table B.5:** Employment Change and Remote Work Index: Ten-Occupation Group

| Covariate           | Monthly Percentage Change in Employment |                   |                        |                       |                               |                   |                        |                       |
|---------------------|-----------------------------------------|-------------------|------------------------|-----------------------|-------------------------------|-------------------|------------------------|-----------------------|
|                     | Benchmark Remote Work Index             |                   |                        |                       | Alternative Remote Work Index |                   |                        |                       |
|                     | $\Delta q_{j,Jan,Feb}$                  |                   | $\Delta q_{j,Feb,Mar}$ |                       | $\Delta q_{j,Mar,Apr}$        |                   | $\Delta q_{j,Feb,Apr}$ |                       |
|                     | (1)                                     | (2)               | (3)                    | (4)                   | (5)                           | (6)               | (7)                    | (8)                   |
| $S_j$ (Benchmark)   | -0.575<br>(1.072)                       | -0.047<br>(6.785) | 10.480*<br>(5.576)     | 9.871<br>(9.537)      |                               |                   |                        |                       |
| $S_j$ (Alternative) |                                         |                   |                        |                       | -0.531<br>(1.299)             | -0.380<br>(8.165) | 12.983*<br>(6.623)     | 11.961<br>(11.468)    |
| Constant            | 0.852<br>(0.509)                        | -4.916<br>(3.224) | -12.931***<br>(2.650)  | -17.077***<br>(4.532) | 0.801<br>(0.508)              | -4.821<br>(3.194) | -12.981***<br>(2.591)  | -17.044***<br>(4.486) |
| No. of observations | 10                                      | 10                | 10                     | 10                    | 10                            | 10                | 10                     | 10                    |
| $R^2$               | 0.035                                   | 0.00001           | 0.306                  | 0.118                 | 0.020                         | 0.0003            | 0.324                  | 0.120                 |
| Adjusted $R^2$      | -0.086                                  | -0.125            | 0.220                  | 0.008                 | -0.102                        | -0.125            | 0.240                  | 0.010                 |

Notes:  $\Delta q_{j,t,\tau}$  is the percentage of change in employment between month  $t$  and  $\tau$  in occupation  $j$ ,  $S_j$  (Benchmark) is the remote work index, and  $S_j$  (Alternative) is the alternative remote work index.

\* $p < 0.1$ ; \*\* $p < 0.05$ ; \*\*\* $p < 0.01$ .

Source: Authors' calculations.

**Table B.6:** Employment Change and Remote Work Index: Industry

| Covariate           | Monthly Percentage Change in Employment |                     |                        |                       |                               |                     |                        |                       |
|---------------------|-----------------------------------------|---------------------|------------------------|-----------------------|-------------------------------|---------------------|------------------------|-----------------------|
|                     | Benchmark Remote Work Index             |                     |                        |                       | Alternative Remote Work Index |                     |                        |                       |
|                     | $\Delta q_{j,Jan,Feb}$                  |                     | $\Delta q_{j,Feb,Mar}$ |                       | $\Delta q_{j,Mar,Apr}$        |                     | $\Delta q_{j,Feb,Apr}$ |                       |
|                     | (1)                                     | (2)                 | (3)                    | (4)                   | (5)                           | (6)                 | (7)                    | (8)                   |
| $S_j$ (Benchmark)   | 0.194<br>(3.447)                        | 1.050<br>(5.459)    | 10.708<br>(8.269)      | 10.819<br>(10.693)    |                               |                     |                        |                       |
| $S_j$ (Alternative) |                                         |                     |                        |                       | 0.449<br>(3.892)              | 0.980<br>(6.167)    | 13.626<br>(9.227)      | 13.476<br>(12.007)    |
| Constant            | 0.520<br>(1.464)                        | -5.156**<br>(2.319) | -13.221***<br>(3.513)  | -17.334***<br>(4.543) | 0.458<br>(1.391)              | -5.069**<br>(2.204) | -13.395***<br>(3.298)  | -17.424***<br>(4.292) |
| No. of observations | 21                                      | 21                  | 21                     | 21                    | 21                            | 21                  | 21                     | 21                    |
| $R^2$               | 0.0002                                  | 0.002               | 0.081                  | 0.051                 | 0.001                         | 0.001               | 0.103                  | 0.062                 |
| Adjusted $R^2$      | -0.052                                  | -0.051              | 0.033                  | 0.001                 | -0.052                        | -0.051              | 0.056                  | 0.013                 |

Notes:  $\Delta q_{j,t,\tau}$  is the percentage of change in employment between month  $t$  and  $\tau$  in occupation  $j$ ,  $S_j$  (Benchmark) is the remote work index, and  $S_j$  (Alternative) is the alternative remote work index.

\* $p < 0.1$ ; \*\* $p < 0.05$ ; \*\*\* $p < 0.01$ .

Source: Authors' calculations.

**Table B.7:** Employment Change and Remote Work Index: Province

| Covariate           | Monthly Percentage Change in Employment |                     |                        |                     |                               |                     |                        |                     |
|---------------------|-----------------------------------------|---------------------|------------------------|---------------------|-------------------------------|---------------------|------------------------|---------------------|
|                     | Benchmark Remote Work Index             |                     |                        |                     | Alternative Remote Work Index |                     |                        |                     |
|                     | $\Delta q_{j,Jan,Feb}$                  |                     | $\Delta q_{j,Feb,Mar}$ |                     | $\Delta q_{j,Mar,Apr}$        |                     | $\Delta q_{j,Feb,Apr}$ |                     |
|                     | (1)                                     | (2)                 | (3)                    | (4)                 | (5)                           | (6)                 | (7)                    | (8)                 |
| $S_j$ (Benchmark)   | 10.702<br>(13.302)                      | 23.865<br>(34.021)  | 10.031<br>(39.161)     | 30.608<br>(53.524)  |                               |                     |                        |                     |
| $S_j$ (Alternative) |                                         |                     |                        |                     | 10.141<br>(12.310)            | 30.652<br>(30.636)  | 0.307<br>(36.454)      | 27.365<br>(49.693)  |
| Constant            | -3.617<br>(5.136)                       | -14.040<br>(13.137) | -14.157<br>(15.121)    | -26.429<br>(20.668) | -3.208<br>(4.520)             | -16.078<br>(11.248) | -10.398<br>(13.385)    | -24.657<br>(18.246) |
| No. of observations | 10                                      | 10                  | 10                     | 10                  | 10                            | 10                  | 10                     | 10                  |
| $R^2$               | 0.075                                   | 0.058               | 0.008                  | 0.039               | 0.078                         | 0.111               | 0.00001                | 0.037               |
| Adjusted $R^2$      | -0.041                                  | -0.060              | -0.116                 | -0.081              | -0.037                        | 0.0001              | -0.125                 | -0.084              |

Notes:  $\Delta q_{j,t,\tau}$  is the percentage of change in employment between month  $t$  and  $\tau$  in occupation  $j$ ,  $S_j$  (Benchmark) is the remote work index, and  $S_j$  (Alternative) is the alternative remote work index.

\* $p < 0.1$ ; \*\* $p < 0.05$ ; \*\*\* $p < 0.01$ .

Source: Authors' calculations.

**Table B.8:** Employment Change and Remote Work Index: City

| Covariate           | Monthly Percentage Change in Employment |                     |                        |                      |                               |                     |                        |                      |
|---------------------|-----------------------------------------|---------------------|------------------------|----------------------|-------------------------------|---------------------|------------------------|----------------------|
|                     | Benchmark Remote Work Index             |                     |                        |                      | Alternative Remote Work Index |                     |                        |                      |
|                     | $\Delta q_{j,Jan,Feb}$                  |                     | $\Delta q_{j,Feb,Mar}$ |                      | $\Delta q_{j,Mar,Apr}$        |                     | $\Delta q_{j,Feb,Apr}$ |                      |
|                     | (1)                                     | (2)                 | (3)                    | (4)                  | (5)                           | (6)                 | (7)                    | (8)                  |
| $S_j$ (Benchmark)   | -29.047***<br>(11.160)                  | 24.853<br>(27.084)  | 32.446<br>(26.637)     | 52.676<br>(39.758)   |                               |                     |                        |                      |
| $S_j$ (Alternative) |                                         |                     |                        |                      | -29.734***<br>(13.062)        | 31.443<br>(29.451)  | 33.223<br>(29.834)     | 59.388<br>(43.761)   |
| Constant            | 12.484***<br>(4.559)                    | -16.155<br>(11.063) | -23.129*<br>(10.881)   | -36.793*<br>(16.241) | 12.110**<br>(5.048)           | -18.152<br>(11.380) | -22.715*<br>(11.528)   | -38.225*<br>(16.910) |
| No. of observations | 10                                      | 10                  | 10                     | 10                   | 10                            | 10                  | 10                     | 10                   |
| $R^2$               | 0.459                                   | 0.095               | 0.156                  | 0.180                | 0.393                         | 0.125               | 0.134                  | 0.187                |
| Adjusted $R^2$      | 0.391                                   | -0.018              | 0.051                  | 0.077                | 0.317                         | 0.015               | 0.026                  | 0.086                |

Notes:  $\Delta q_{j,t,\tau}$  is the percentage of change in employment between month  $t$  and  $\tau$  in occupation  $j$ ,  $S_j$  (Benchmark) is the remote work index, and  $S_j$  (Alternative) is the alternative remote work index.

\* $p < 0.1$ ; \*\* $p < 0.05$ ; \*\*\* $p < 0.01$ .

Source: Authors' calculations.
